# Supplementary material for: Autoimmune encephalitis: proposed recommendations for symptomatic and long-term management
Source: PubMed Central journal article supplement (PMC8292591; doi:10.1136/jnnp-2020-325302), 2021-03-01
Supplement: jnnp-2020-325302supp002.pdf [file jnnp-2020-325302supp002.pdf]

Management of Autoimmune Encephalitis (AE)

SurveyMonkey

## Q1 Please provide your information

Answered: 68 Skipped: 0

| ANSWER CHOICES  | RESPONSES |    |
|-----------------|-----------|----|
| Name            | 100.00%   | 68 |
| Institution     | 100.00%   | 68 |
| Title           | 98.53%    | 67 |
| Address 2       | 0.00%     | 0  |
| City/Town       | 0.00%     | 0  |
| State/Province  | 0.00%     | 0  |
| ZIP/Postal Code | 0.00%     | 0  |
| Country         | 0.00%     | 0  |
| Email Address   | 98.53%    | 67 |
| Phone Number    | 0.00%     | 0  |

## Management of Autoimmune Encephalitis (AE)

SurveyMonkey

## Q2 What is your specialty (check all that apply)?

Answered: 68 Skipped: 0

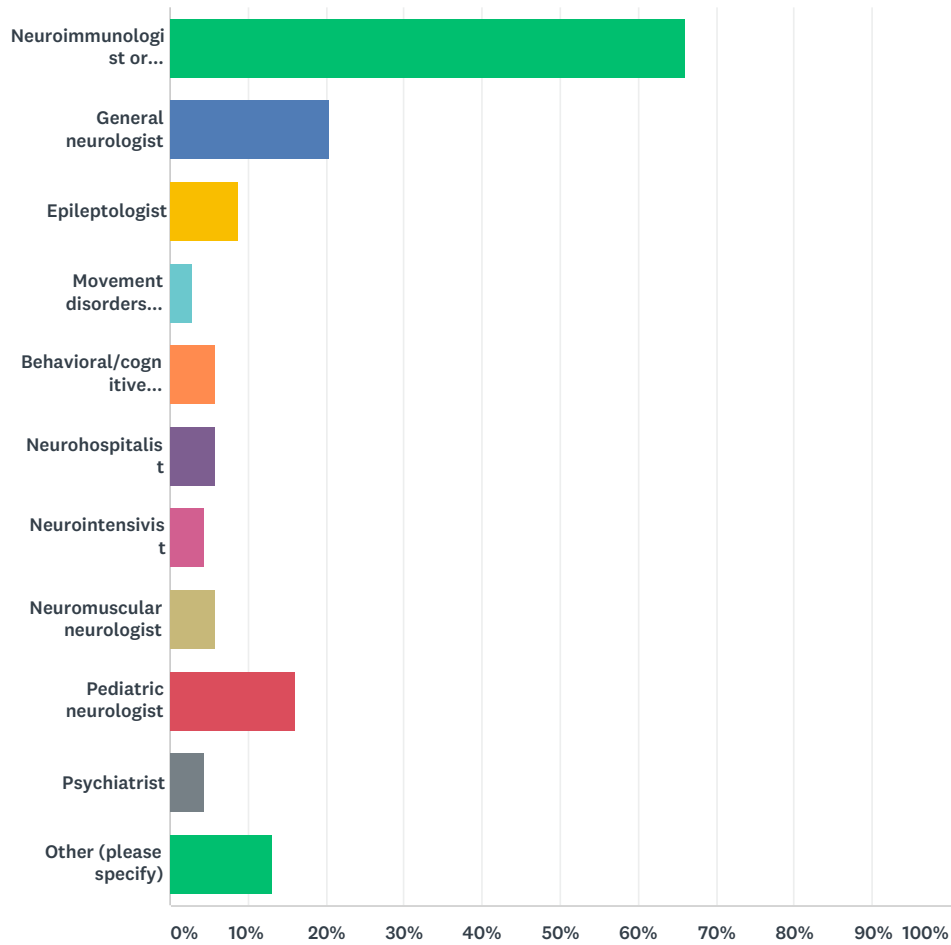

| ANSWER CHOICES                              | RESPONSES |    |
|---------------------------------------------|-----------|----|
| Neuroimmunologist or autoimmune neurologist | 66.18%    | 45 |
| General neurologist                         | 20.59%    | 14 |
| Epileptologist                              | 8.82%     | 6  |
| Movement disorders specialist               | 2.94%     | 2  |
| Behavioral/cognitive neurologist            | 5.88%     | 4  |
| Neurohospitalist                            | 5.88%     | 4  |
| Neurointensivist                            | 4.41%     | 3  |
| Neuromuscular neurologist                   | 5.88%     | 4  |
| Pediatric neurologist                       | 16.18%    | 11 |
| Psychiatrist                                | 4.41%     | 3  |

## Management of Autoimmune Encephalitis (AE)

SurveyMonkey

---

|                        |        |   |
|------------------------|--------|---|
| Other (please specify) | 13.24% | 9 |
| Total Respondents: 68  |        |   |

Management of Autoimmune Encephalitis (AE)

SurveyMonkey

## Q3 Do you want to be included in the affiliated authors on the paper?

Answered: 68 Skipped: 0

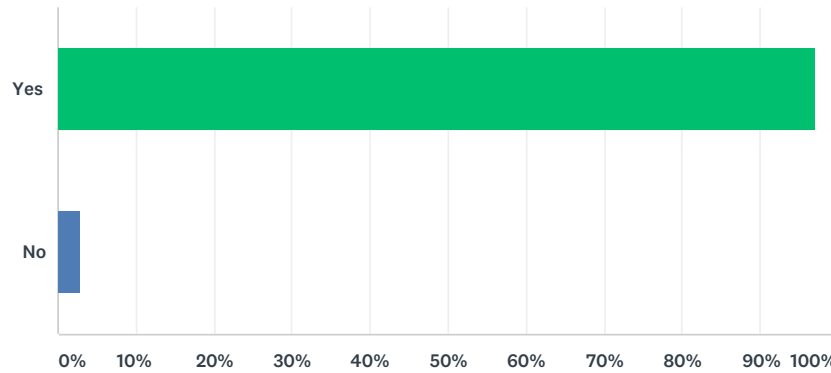

| ANSWER CHOICES | RESPONSES |    |
|----------------|-----------|----|
| Yes            | 97.06%    | 66 |
| No             | 2.94%     | 2  |
| TOTAL          |           | 68 |

Management of Autoimmune Encephalitis (AE)

SurveyMonkey

## Q4 Do you want to review and edit the initial manuscript when ready?

Answered: 68 Skipped: 0

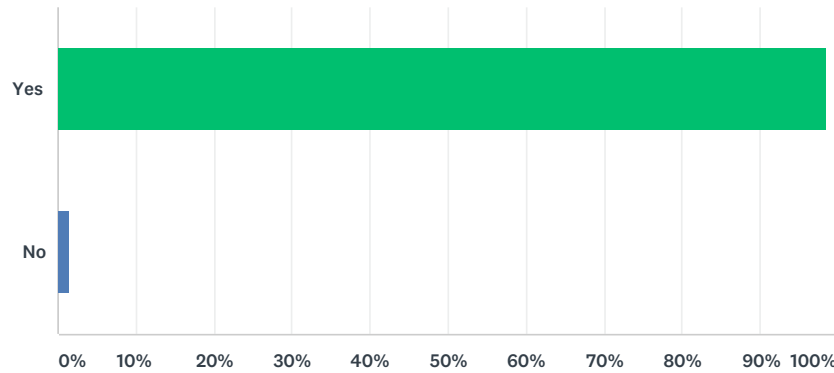

| ANSWER CHOICES | RESPONSES |    |
|----------------|-----------|----|
| Yes            | 98.53%    | 67 |
| No             | 1.47%     | 1  |
| TOTAL          |           | 68 |

## Management of Autoimmune Encephalitis (AE)

SurveyMonkey

### Q5 For acute treatment of AE, which first line therapy would you choose in a previously healthy patient?

Answered: 68 Skipped: 0

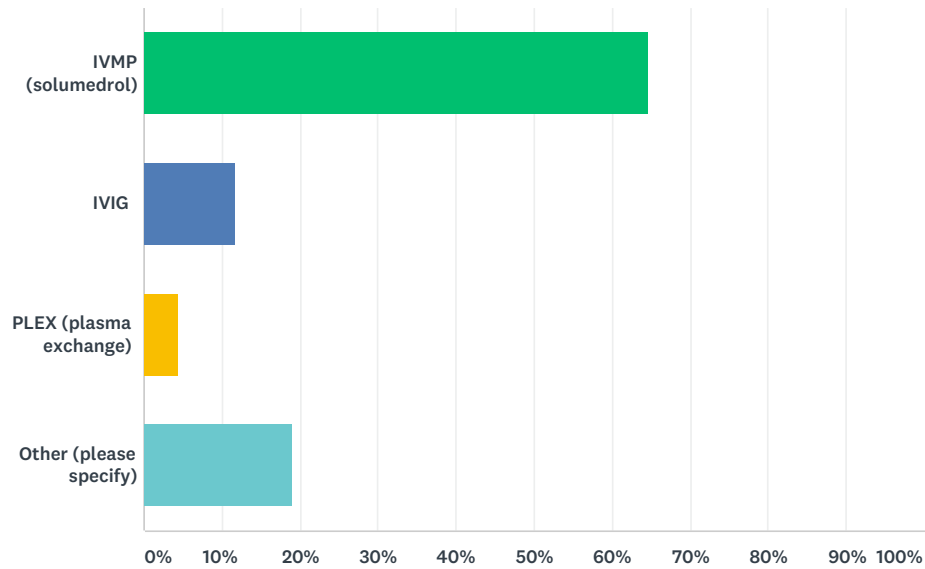

| ANSWER CHOICES         | RESPONSES |
|------------------------|-----------|
| IVMP (solumedrol)      | 64.71% 44 |
| IVIG                   | 11.76% 8  |
| PLEX (plasma exchange) | 4.41% 3   |
| Other (please specify) | 19.12% 13 |
| TOTAL                  | 68        |

## Management of Autoimmune Encephalitis (AE)

SurveyMonkey

### Q6 For acute treatment of AE, which first line therapy would you choose in a patient with uncontrolled diabetes and/or hypertension?

Answered: 68 Skipped: 0

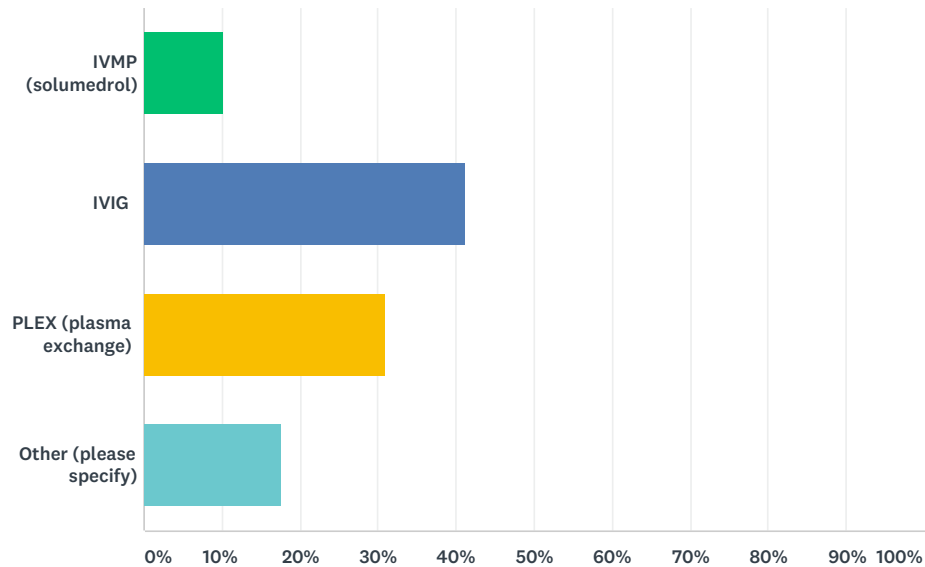

| ANSWER CHOICES         | RESPONSES |    |
|------------------------|-----------|----|
| IVMP (solumedrol)      | 10.29%    | 7  |
| IVIG                   | 41.18%    | 28 |
| PLEX (plasma exchange) | 30.88%    | 21 |
| Other (please specify) | 17.65%    | 12 |
| TOTAL                  |           | 68 |

## Management of Autoimmune Encephalitis (AE)

SurveyMonkey

### Q7 For acute treatment of AE, which first line therapy would you choose in a patient with a clinical picture suggestive of NMDAR encephalitis?

Answered: 68 Skipped: 0

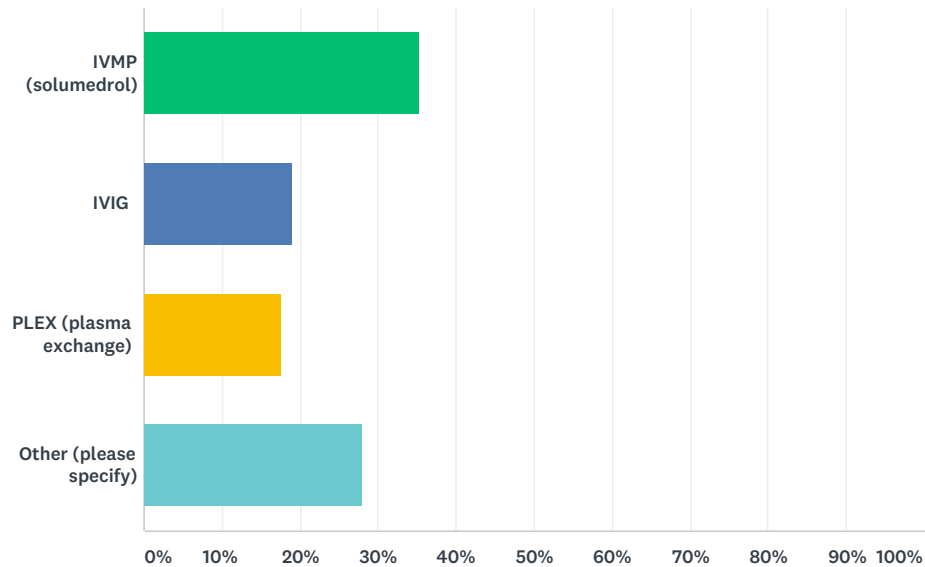

| ANSWER CHOICES         | RESPONSES |    |
|------------------------|-----------|----|
| IVMP (solumedrol)      | 35.29%    | 24 |
| IVIG                   | 19.12%    | 13 |
| PLEX (plasma exchange) | 17.65%    | 12 |
| Other (please specify) | 27.94%    | 19 |
| TOTAL                  |           | 68 |



## Management of Autoimmune Encephalitis (AE)

SurveyMonkey

### Q8 For acute treatment of AE, which first line therapy would you choose in a patient presenting with faciobrachial dystonic seizures suggestive of anti-LGI1 encephalitis?

Answered: 67 Skipped: 1

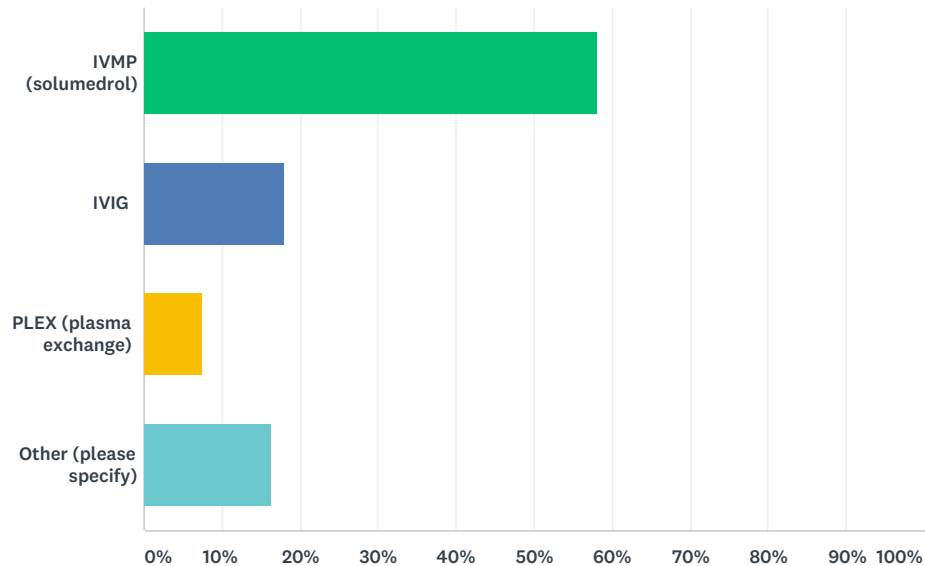

| ANSWER CHOICES         | RESPONSES |
|------------------------|-----------|
| IVMP (solumedrol)      | 58.21% 39 |
| IVIG                   | 17.91% 12 |
| PLEX (plasma exchange) | 7.46% 5   |
| Other (please specify) | 16.42% 11 |
| TOTAL                  | 67        |

## Management of Autoimmune Encephalitis (AE)

SurveyMonkey

### Q9 For acute treatment of AE, which first line therapy would you choose in a patient with known or highly suspected paraneoplastic AE?

Answered: 68 Skipped: 0

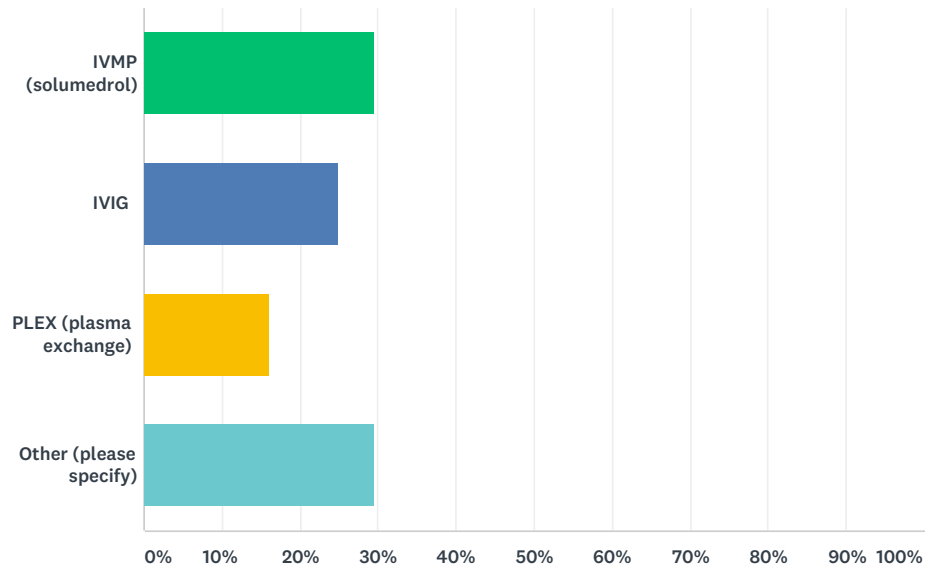

| ANSWER CHOICES         | RESPONSES |    |
|------------------------|-----------|----|
| IVMP (solumedrol)      | 29.41%    | 20 |
| IVIG                   | 25.00%    | 17 |
| PLEX (plasma exchange) | 16.18%    | 11 |
| Other (please specify) | 29.41%    | 20 |
| TOTAL                  |           | 68 |

### Q10 For acute treatment of AE, which first line therapy would you choose in a patient presenting solely with cognitive/psychiatric presentation?

Answered: 67 Skipped: 1

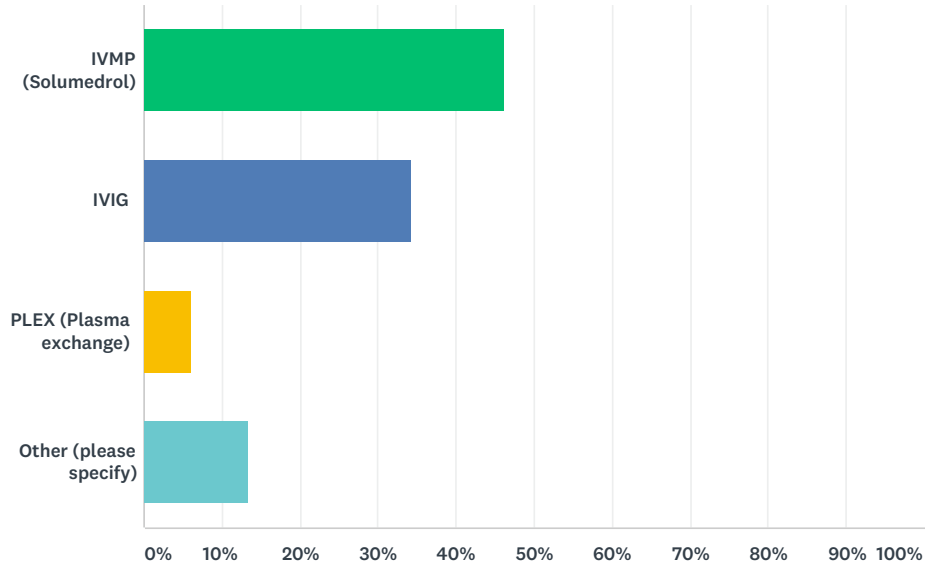

| ANSWER CHOICES         | RESPONSES |    |
|------------------------|-----------|----|
| IVMP (Solumedrol)      | 46.27%    | 31 |
| IVIG                   | 34.33%    | 23 |
| PLEX (Plasma exchange) | 5.97%     | 4  |
| Other (please specify) | 13.43%    | 9  |
| TOTAL                  |           | 67 |

Management of Autoimmune Encephalitis (AE)

SurveyMonkey

## Q11 If no response to your initial first line therapy, what would you do next?

Answered: 68 Skipped: 0

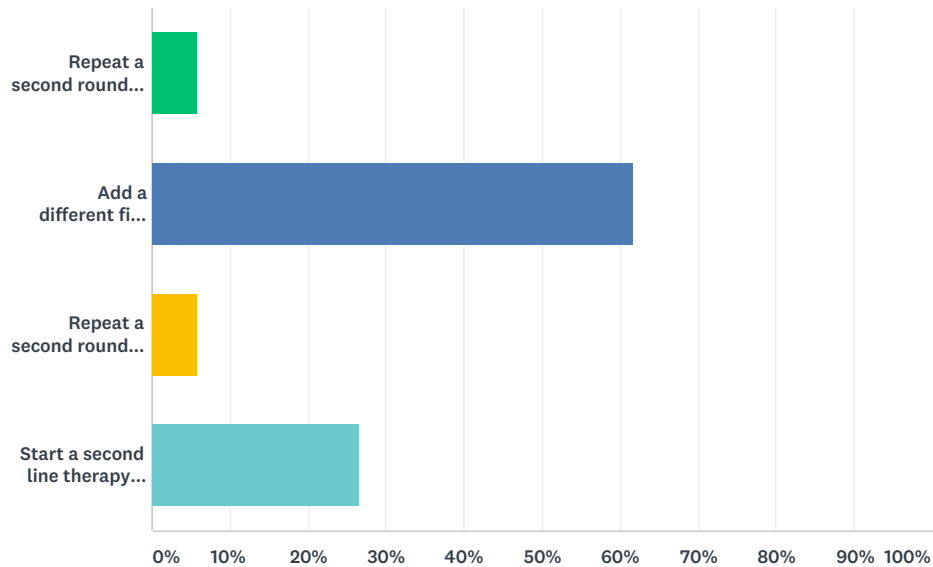

| ANSWER CHOICES                                                                               | RESPONSES |    |
|----------------------------------------------------------------------------------------------|-----------|----|
| Repeat a second round of the same first line therapy.                                        | 5.88%     | 4  |
| Add a different first line therapy                                                           | 61.76%    | 42 |
| Repeat a second round of the same first line therapy and add a different first line therapy. | 5.88%     | 4  |
| Start a second line therapy directly.                                                        | 26.47%    | 18 |
| TOTAL                                                                                        |           | 68 |

Management of Autoimmune Encephalitis (AE)

SurveyMonkey

## Q12 What second line therapy would you use in the acute setting if the patient is resistant to first line therapy?

Answered: 68 Skipped: 0

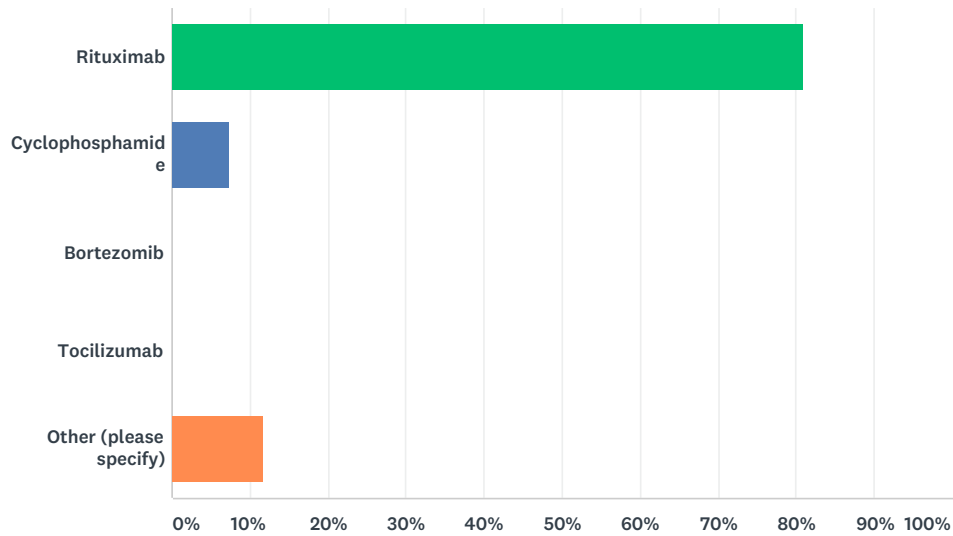

| ANSWER CHOICES         | RESPONSES |           |
|------------------------|-----------|-----------|
| Rituximab              | 80.88%    | 55        |
| Cyclophosphamide       | 7.35%     | 5         |
| Bortezomib             | 0.00%     | 0         |
| Tocilizumab            | 0.00%     | 0         |
| Other (please specify) | 11.76%    | 8         |
| <b>TOTAL</b>           |           | <b>68</b> |

Management of Autoimmune Encephalitis (AE)

SurveyMonkey

### Q13 How frequent do you use rituximab in the acute setting as a second line therapy?

Answered: 68 Skipped: 0

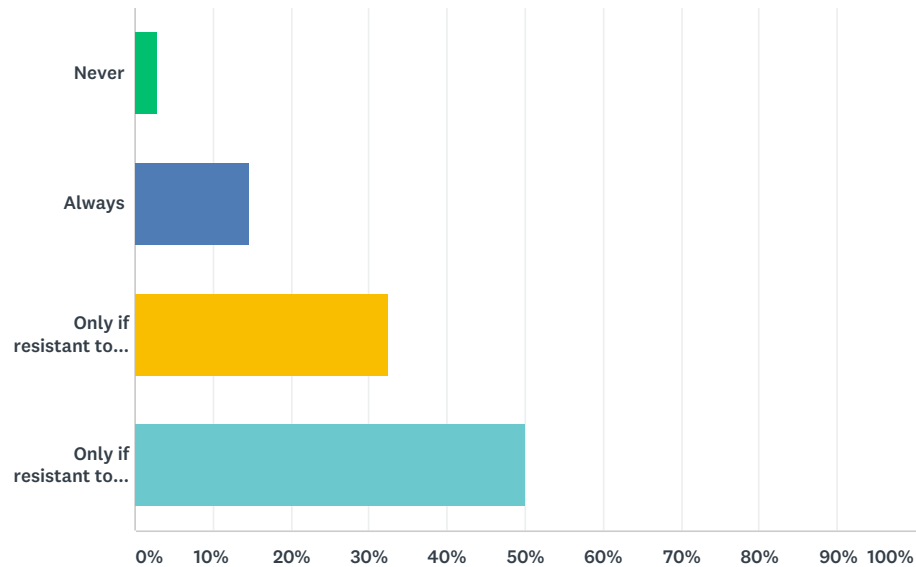

| ANSWER CHOICES                                                    | RESPONSES |    |
|-------------------------------------------------------------------|-----------|----|
| Never                                                             | 2.94%     | 2  |
| Always                                                            | 14.71%    | 10 |
| Only if resistant to one modality of first line therapy.          | 32.35%    | 22 |
| Only if resistant to combined modalities of first line therapies. | 50.00%    | 34 |
| TOTAL                                                             |           | 68 |

### Q14 What do you use as a bridging therapy in AE patients after acute treatment?

Answered: 68 Skipped: 0

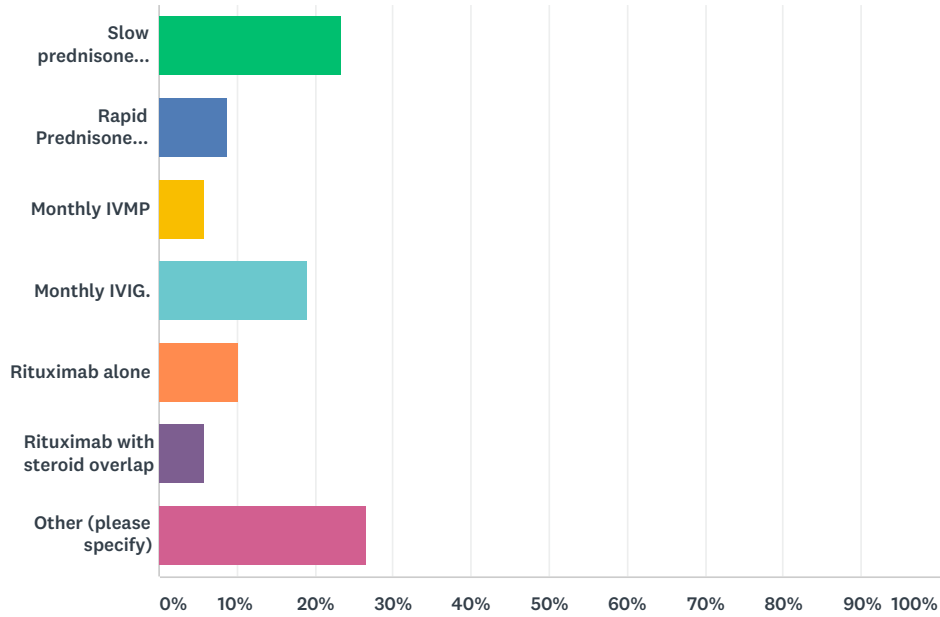

| ANSWER CHOICES                 | RESPONSES |           |
|--------------------------------|-----------|-----------|
| Slow prednisone taper (months) | 23.53%    | 16        |
| Rapid Prednisone taper (weeks) | 8.82%     | 6         |
| Monthly IVMP                   | 5.88%     | 4         |
| Monthly IVIG.                  | 19.12%    | 13        |
| Rituximab alone                | 10.29%    | 7         |
| Rituximab with steroid overlap | 5.88%     | 4         |
| Other (please specify)         | 26.47%    | 18        |
| <b>TOTAL</b>                   |           | <b>68</b> |

Management of Autoimmune Encephalitis (AE)

SurveyMonkey

Q15 Which of the following clinical scenarios would you choose for long term or maintenance immunosuppression (check all that apply)?

Answered: 67 Skipped: 1

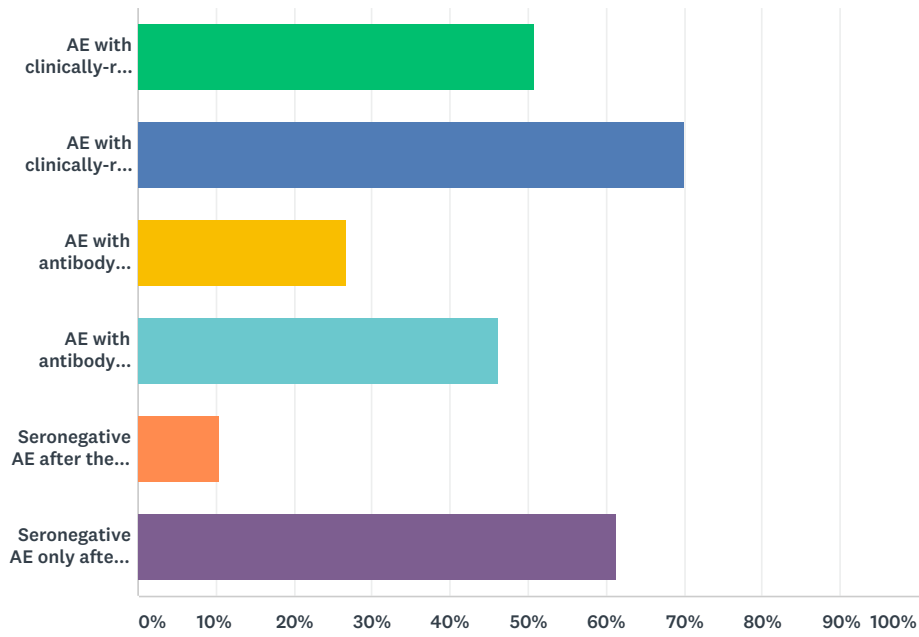

| ANSWER CHOICES                                                                               | RESPONSES |    |
|----------------------------------------------------------------------------------------------|-----------|----|
| AE with clinically-relevant Neuronal surface antibody after the first attack.                | 50.75%    | 34 |
| AE with clinically-relevant Neuronal surface antibody only after a definitive second relapse | 70.15%    | 47 |
| AE with antibody against intracellular antigen after tumor treatment                         | 26.87%    | 18 |
| AE with antibody against intracellular antigen but negative tumor screen.                    | 46.27%    | 31 |
| Seronegative AE after the first attack.                                                      | 10.45%    | 7  |
| Seronegative AE only after a definitive second relapse.                                      | 61.19%    | 41 |
| Total Respondents: 67                                                                        |           |    |



## Management of Autoimmune Encephalitis (AE)

SurveyMonkey

## Q16 How long would you keep a patient with recurrent AE on long term immunosuppression?

Answered: 68 Skipped: 0

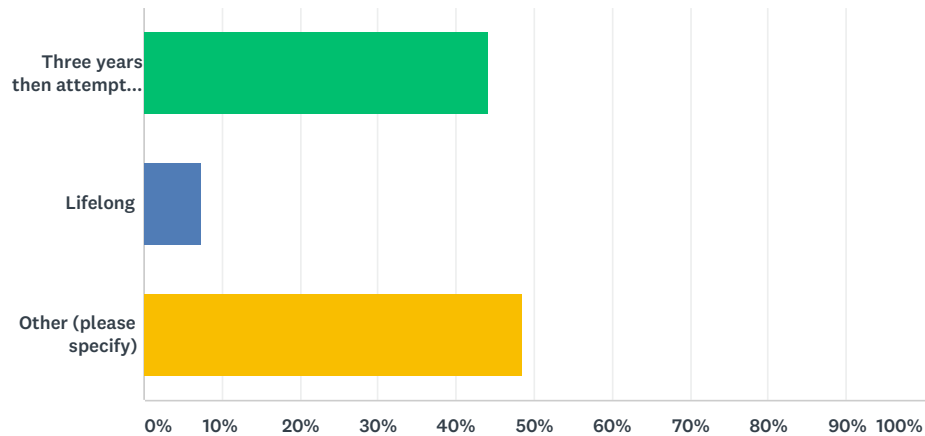

| ANSWER CHOICES                                                   | RESPONSES |    |
|------------------------------------------------------------------|-----------|----|
| Three years then attempt careful withdrawal of immunosuppression | 44.12%    | 30 |
| Lifelong                                                         | 7.35%     | 5  |
| Other (please specify)                                           | 48.53%    | 33 |
| TOTAL                                                            |           | 68 |

### Q17 What agent would you choose for long term immunosuppression in recurrent AE?

Answered: 68 Skipped: 0

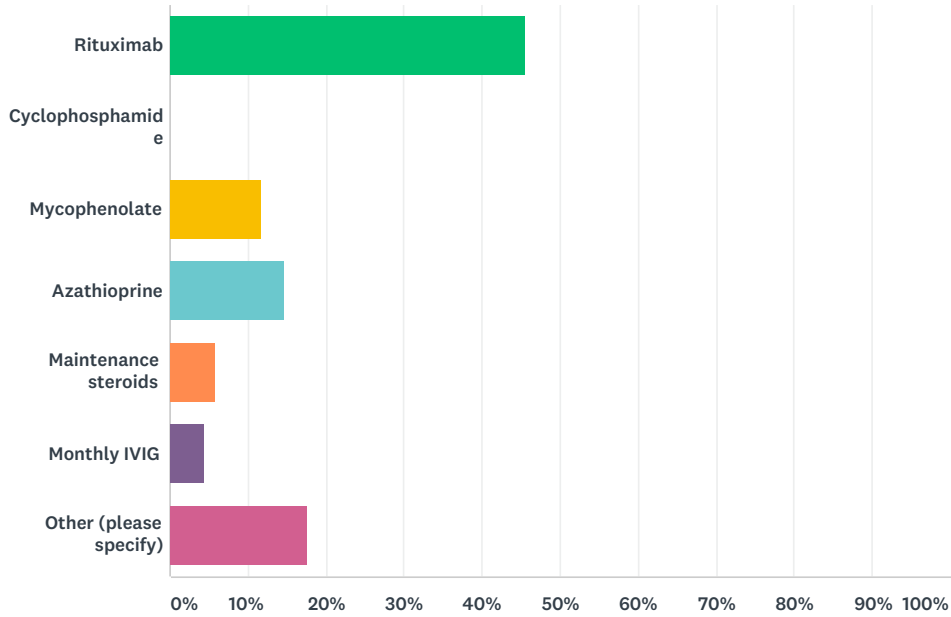

| ANSWER CHOICES         | RESPONSES |           |
|------------------------|-----------|-----------|
| Rituximab              | 45.59%    | 31        |
| Cyclophosphamide       | 0.00%     | 0         |
| Mycophenolate          | 11.76%    | 8         |
| Azathioprine           | 14.71%    | 10        |
| Maintenance steroids   | 5.88%     | 4         |
| Monthly IVIG           | 4.41%     | 3         |
| Other (please specify) | 17.65%    | 12        |
| <b>TOTAL</b>           |           | <b>68</b> |

## Management of Autoimmune Encephalitis (AE)

SurveyMonkey

**Q18** After the initial screening, the European Federation of Neurological Societies recommend periodic cancer screening every 6-12 months for up to 4 years in patients with classical paraneoplastic syndromes, how frequent and for how long would you perform cancer screening in patients with AE associated with antibodies against neuronal surface antigens?

Answered: 67 Skipped: 1

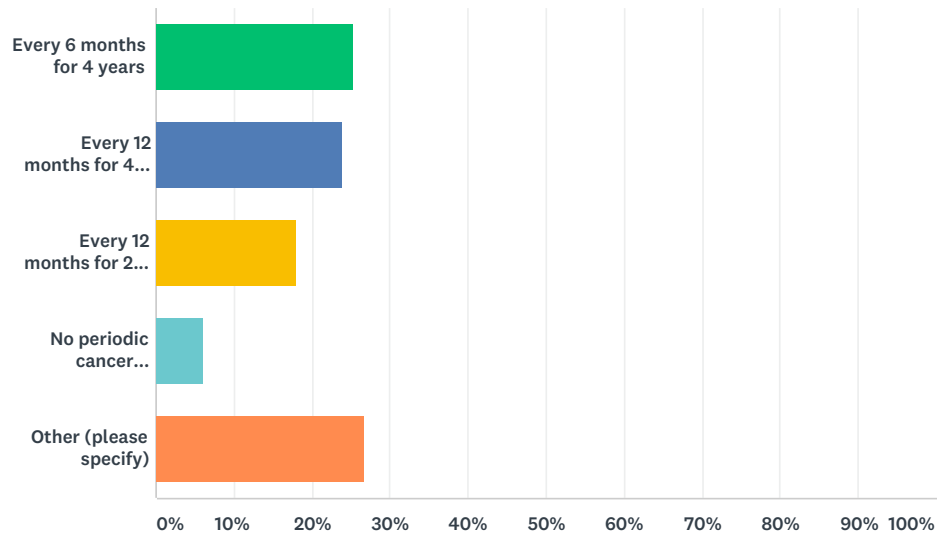

| ANSWER CHOICES                          | RESPONSES |           |
|-----------------------------------------|-----------|-----------|
| Every 6 months for 4 years              | 25.37%    | 17        |
| Every 12 months for 4 years             | 23.88%    | 16        |
| Every 12 months for 2 years             | 17.91%    | 12        |
| No periodic cancer screening necessary. | 5.97%     | 4         |
| Other (please specify)                  | 26.87%    | 18        |
| <b>TOTAL</b>                            |           | <b>67</b> |

## Q19 After the initial cancer screening, how frequent and for how long would you perform periodic cancer screening in patients with post-herpetic AE?

Answered: 67 Skipped: 1

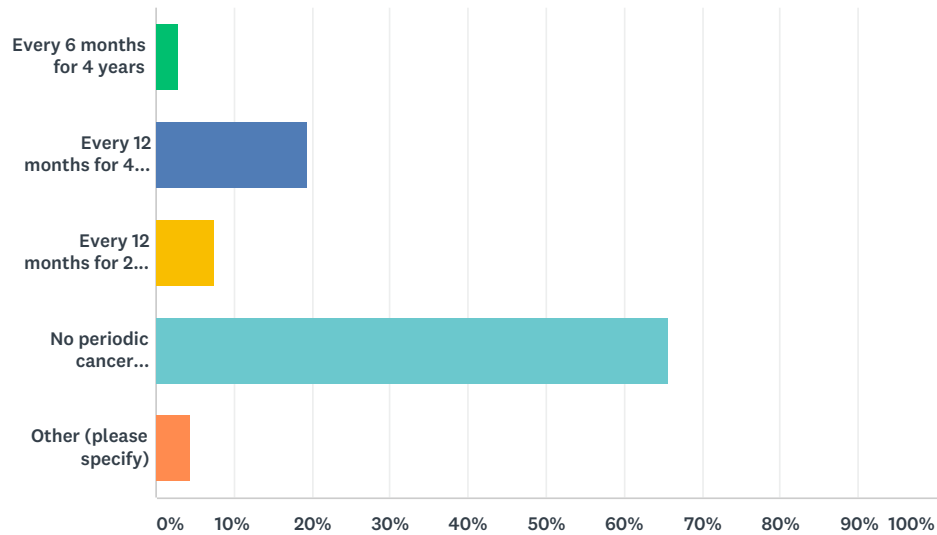

| ANSWER CHOICES                          | RESPONSES |
|-----------------------------------------|-----------|
| Every 6 months for 4 years              | 2.99% 2   |
| Every 12 months for 4 years             | 19.40% 13 |
| Every 12 months for 2 years             | 7.46% 5   |
| No periodic cancer screening necessary. | 65.67% 44 |
| Other (please specify)                  | 4.48% 3   |
| <b>TOTAL</b>                            | <b>67</b> |

## Management of Autoimmune Encephalitis (AE)

SurveyMonkey

**Q20 After the initial cancer screening, how frequent and for how long would you perform periodic cancer screening in patients with iatrogenic AE (in the setting of immune-modulating therapy other than checkpoint inhibitors)?**

Answered: 66 Skipped: 2

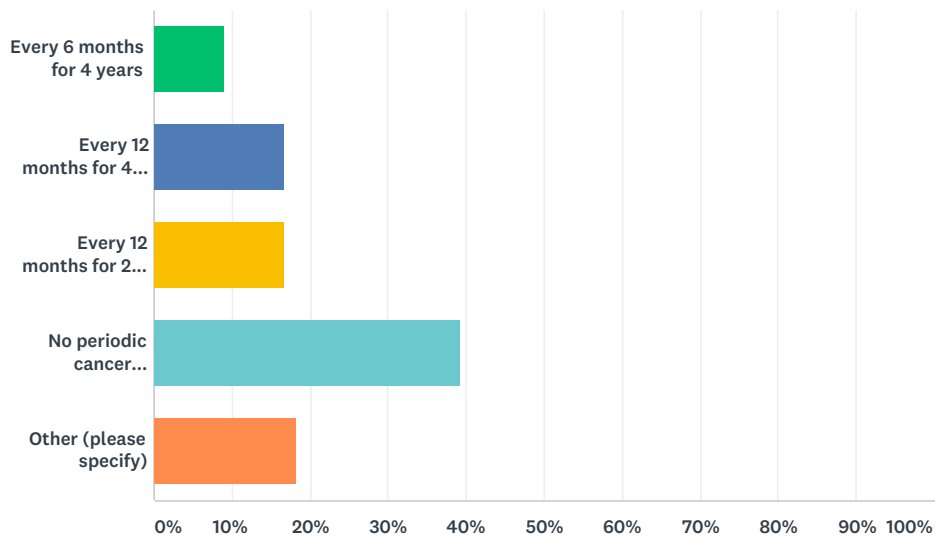

| ANSWER CHOICES                          | RESPONSES |           |
|-----------------------------------------|-----------|-----------|
| Every 6 months for 4 years              | 9.09%     | 6         |
| Every 12 months for 4 years             | 16.67%    | 11        |
| Every 12 months for 2 years             | 16.67%    | 11        |
| No periodic cancer screening necessary. | 39.39%    | 26        |
| Other (please specify)                  | 18.18%    | 12        |
| <b>TOTAL</b>                            |           | <b>66</b> |

Management of Autoimmune Encephalitis (AE)

SurveyMonkey

## Q21 After the initial cancer screening, how frequent and for how long would you perform periodic cancer screening in patients with seronegative limbic encephalitis?

Answered: 66 Skipped: 2

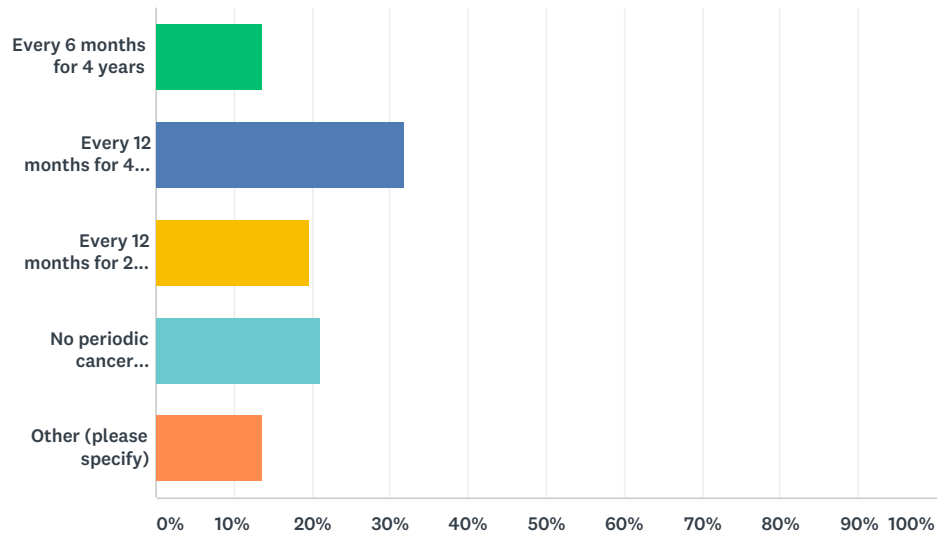

| ANSWER CHOICES                          | RESPONSES |           |
|-----------------------------------------|-----------|-----------|
| Every 6 months for 4 years              | 13.64%    | 9         |
| Every 12 months for 4 years             | 31.82%    | 21        |
| Every 12 months for 2 years             | 19.70%    | 13        |
| No periodic cancer screening necessary. | 21.21%    | 14        |
| Other (please specify)                  | 13.64%    | 9         |
| <b>TOTAL</b>                            |           | <b>66</b> |

## Management of Autoimmune Encephalitis (AE)

SurveyMonkey

**Q22 After the initial cancer screening, how frequent and for how long would you perform cancer screening in patients with seronegative AE other than limbic encephalitis (e.g. cortical, striatal, brainstem, cerebellar)?**

Answered: 66 Skipped: 2

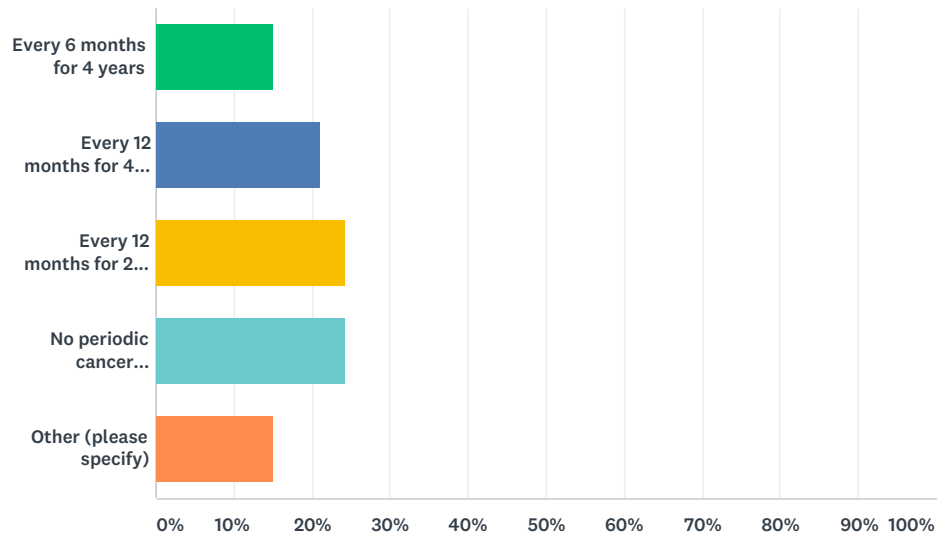

| ANSWER CHOICES                          | RESPONSES |           |
|-----------------------------------------|-----------|-----------|
| Every 6 months for 4 years              | 15.15%    | 10        |
| Every 12 months for 4 years             | 21.21%    | 14        |
| Every 12 months for 2 years             | 24.24%    | 16        |
| No periodic cancer screening necessary. | 24.24%    | 16        |
| Other (please specify)                  | 15.15%    | 10        |
| <b>TOTAL</b>                            |           | <b>66</b> |

## Management of Autoimmune Encephalitis (AE)

SurveyMonkey

### Q23 Do you order/review GRE or SWI sequences when evaluating brain MRI in a suspected case of AE?

Answered: 68 Skipped: 0

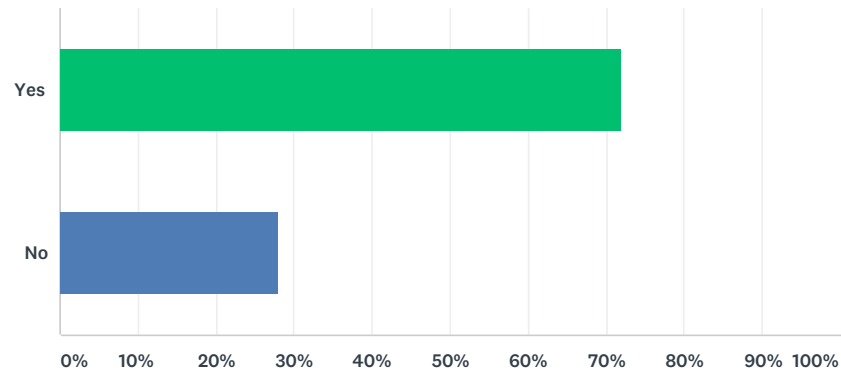

| ANSWER CHOICES | RESPONSES |    |
|----------------|-----------|----|
| Yes            | 72.06%    | 49 |
| No             | 27.94%    | 19 |
| TOTAL          |           | 68 |



Management of Autoimmune Encephalitis (AE)

SurveyMonkey

## Q24 If GRE or SWI sequences show hemorrhagic areas in the temporal lobes, what would be your provisional diagnosis?

Answered: 66 Skipped: 2

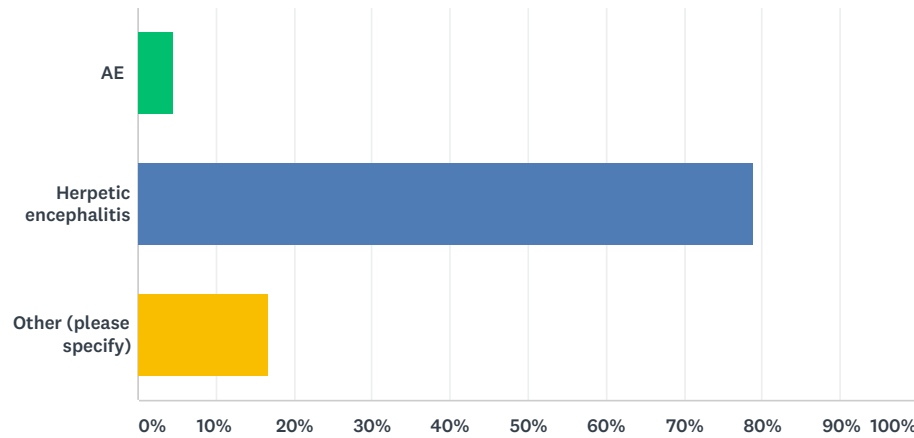

| ANSWER CHOICES         | RESPONSES |    |
|------------------------|-----------|----|
| AE                     | 4.55%     | 3  |
| Herpetic encephalitis  | 78.79%    | 52 |
| Other (please specify) | 16.67%    | 11 |
| TOTAL                  |           | 66 |
